# Supplementary material for: A facile and versatile partitioned cooperative self-assembly process to prepare SBA-15s with larger mesopores, high microporosity and tunable particle sizes
Source: Royal Society of Chemistry journal article supplement (doi:10.1039/c1jm12001h), 2011-01-01
Supplement: c1jm12001h.pdf [file c1jm12001h.pdf]

## Electronic Supplementary Information

### A Facile and Versatile Partitioned Cooperative Self-assembly Process to Prepare SBA-15s with Larger Mesopores, High Microporosity and Tunable Particle Sizes

Wei Wang, Weijun Shan, Hongqiang Ru\*, Nan Wu

Fig.S1.

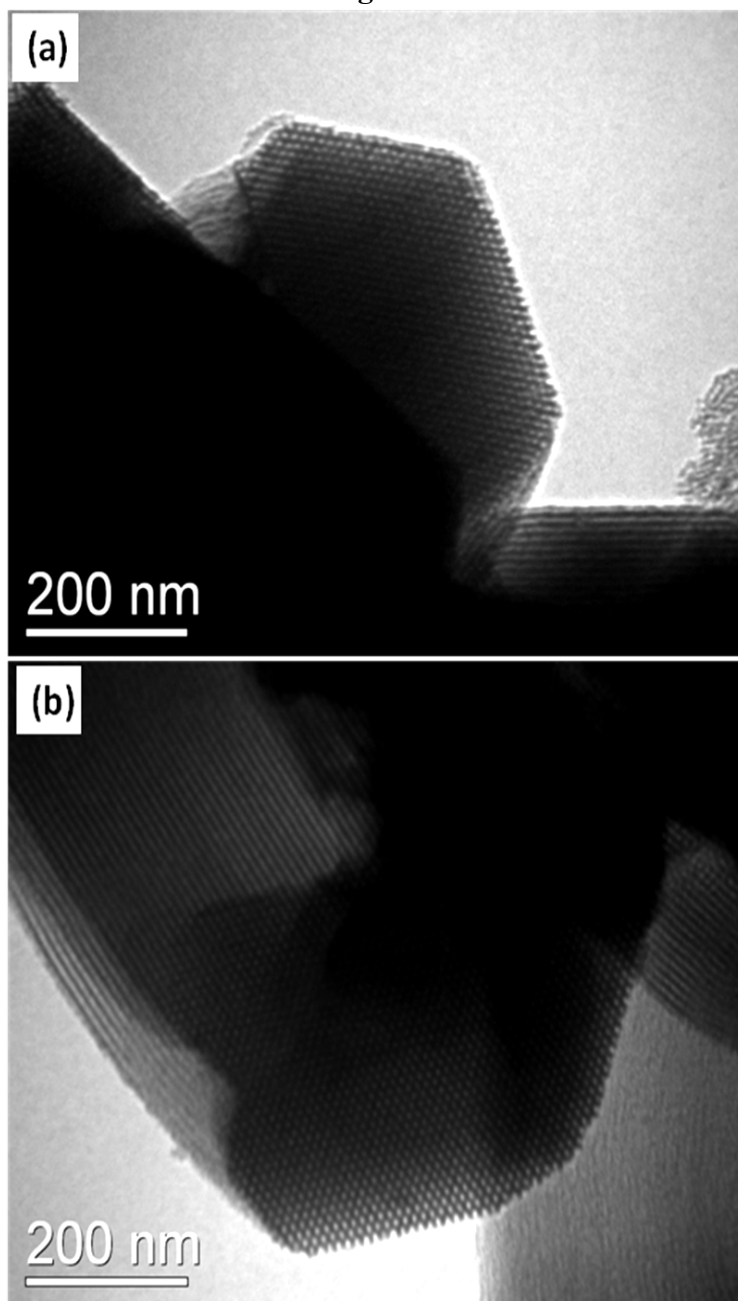

Fig.S1. TEMs of (a) SS2-1h-8.5@95 and (b) SS8-1h-2.5@95.

**Fig.S2**

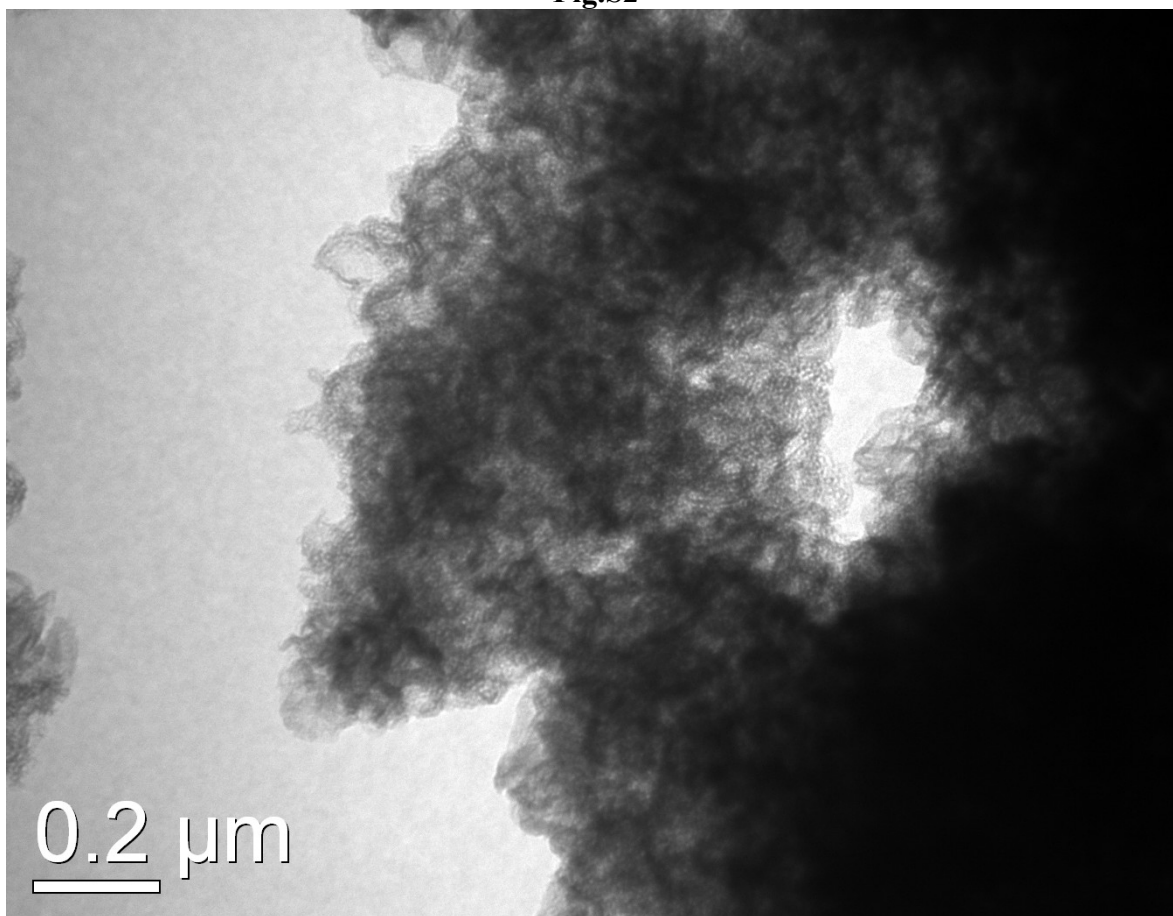

**Fig.S2.** TEM of SS5-7h-5.5@95

**Fig.S3**

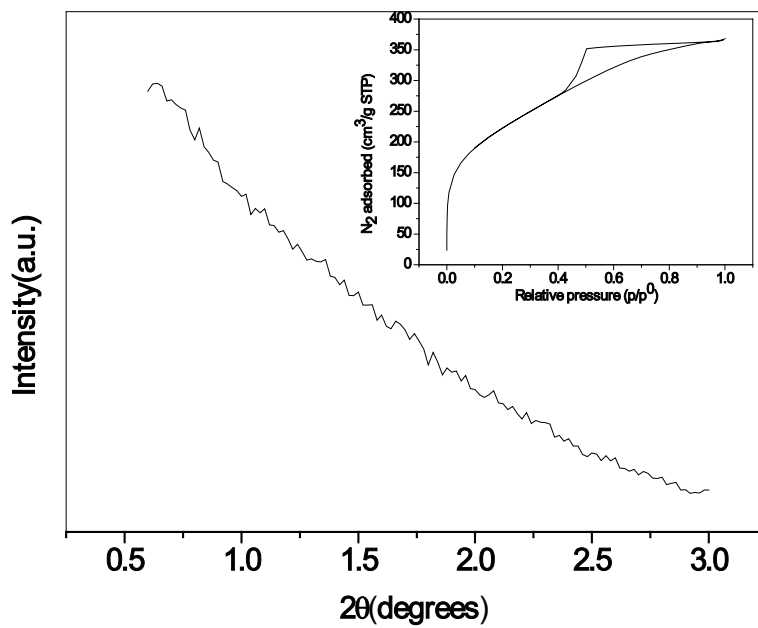

**Fig.S3.** XRD pattern and Nitrogen sorption results (inset) of SS5.0@95.

Fig.S4

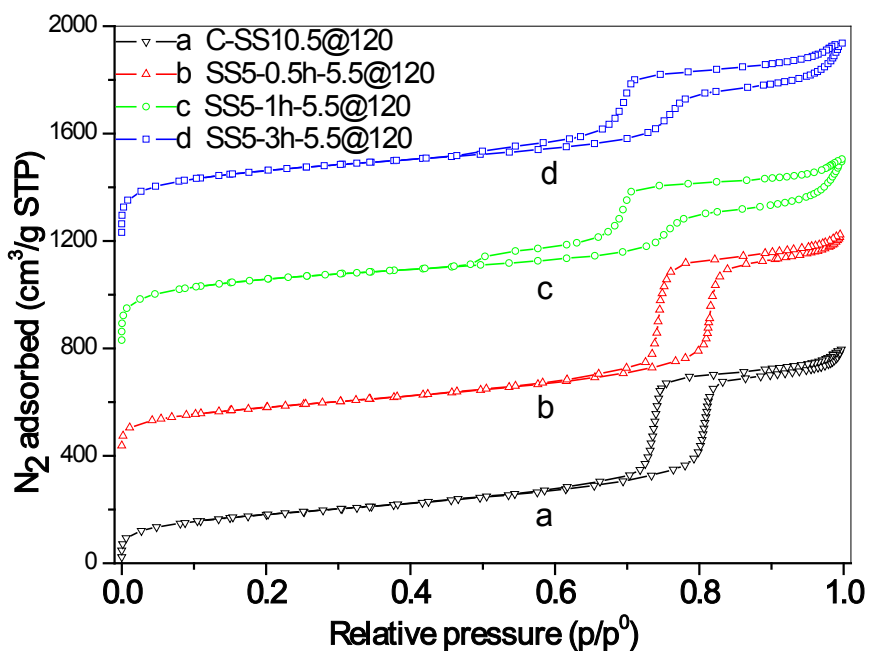

Fig.S4-a. Adsorption and desorption isotherms of (a) C-SS10.5@120, (b)SS5-0.5h-5.5@120, (c)SS5-1h-5.5@120 and (d) SS5-3h-5.5@120. The isotherms of (b), (c) and (d) were offset vertically by 400, 800, 120cm<sup>3</sup>(STP)/g to avoid overlap.

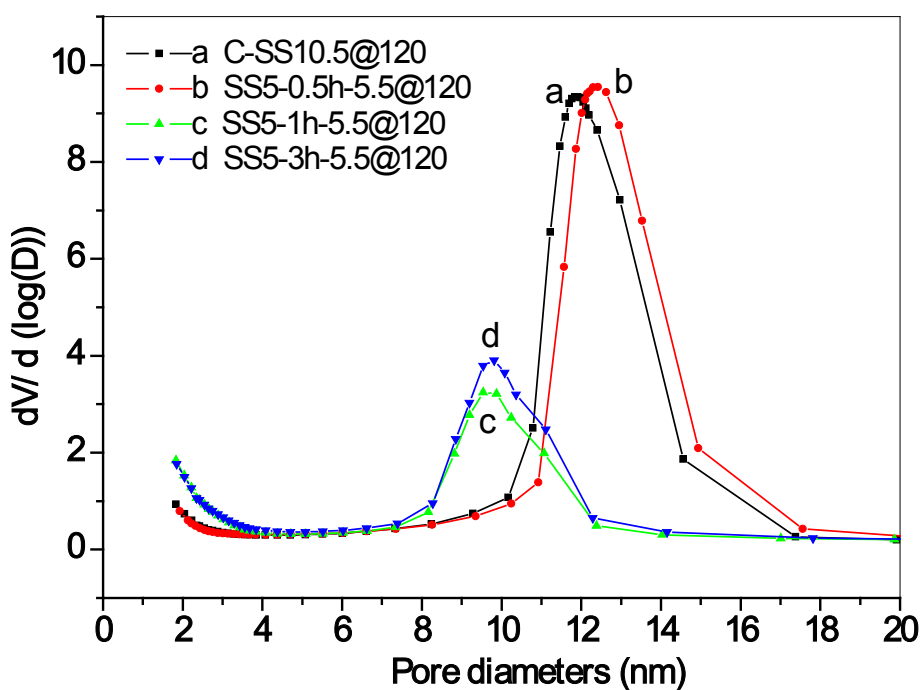

Fig.S4-b. KJS PSDs of (a)C-SS10.5@120, (b)SS5-0.5h-5.5@120, (c)SS5-1h-5.5@120 and (d) SS5-3h-5.5@120.

Fig.S5

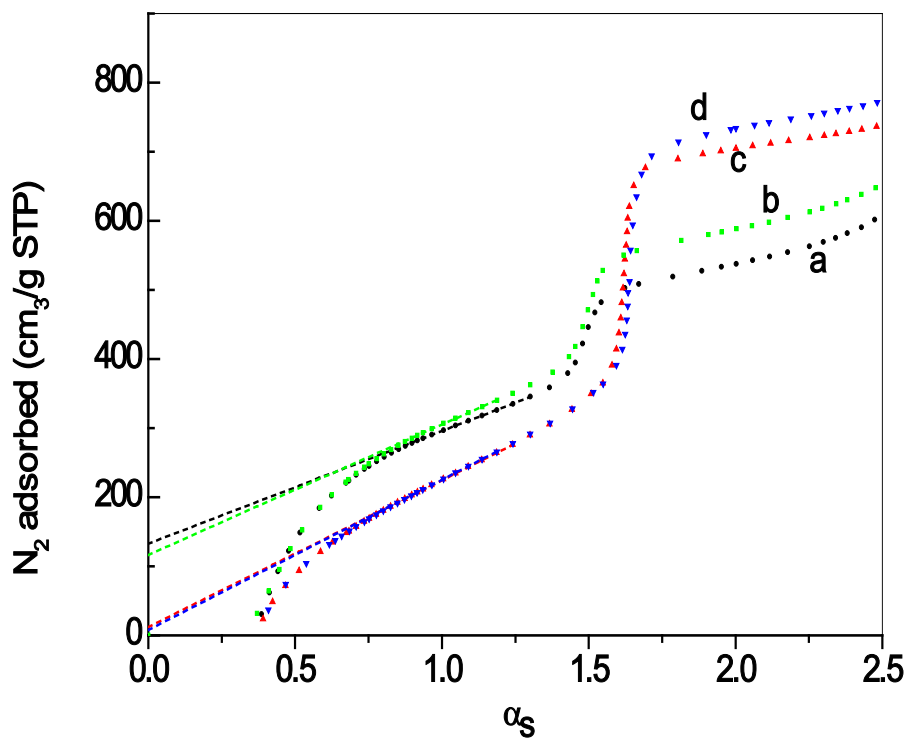

Fig.S5.  $\alpha_s$ -plots analysis and microporosities (column chart, inset) of (a) SS5-1h-5.5@120, (b) SS5-3h-5.5@120, (c) C-SS10.5@120 and (d) SS5-0.5h-5.5@120.

Fig.S6

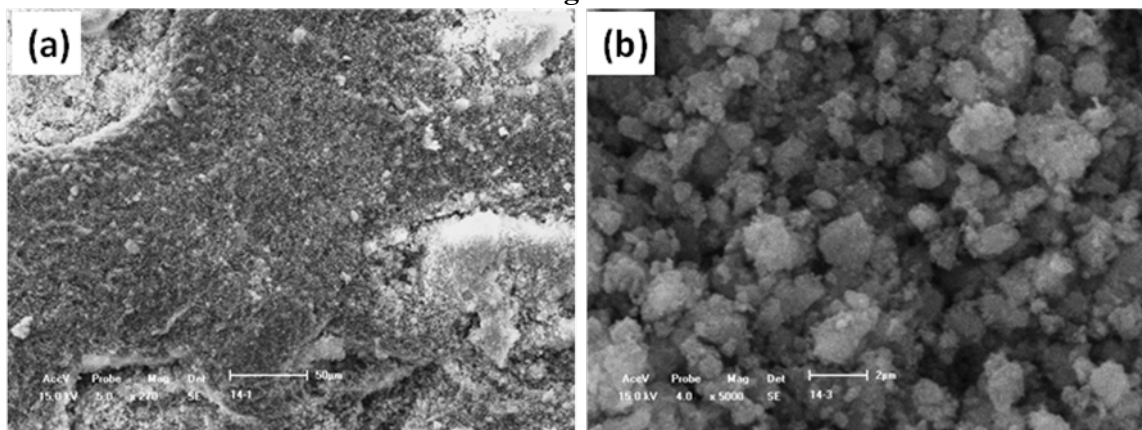

Fig.S6. SEMs of SS5-7h-5.5@95 at different magnifications.

Fig.S7

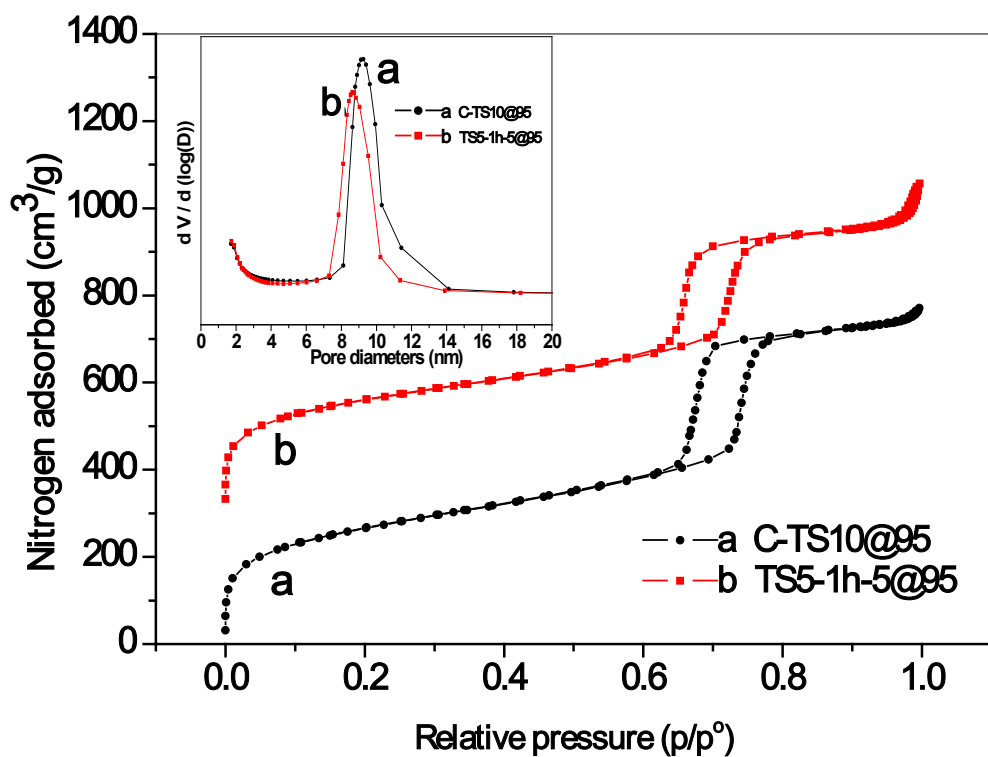

Fig.S7. N<sub>2</sub> sorption measurement and PSDs (inset) of (a) C-TS10@95 and (b) TS5-1h-5@95.

Fig.S8

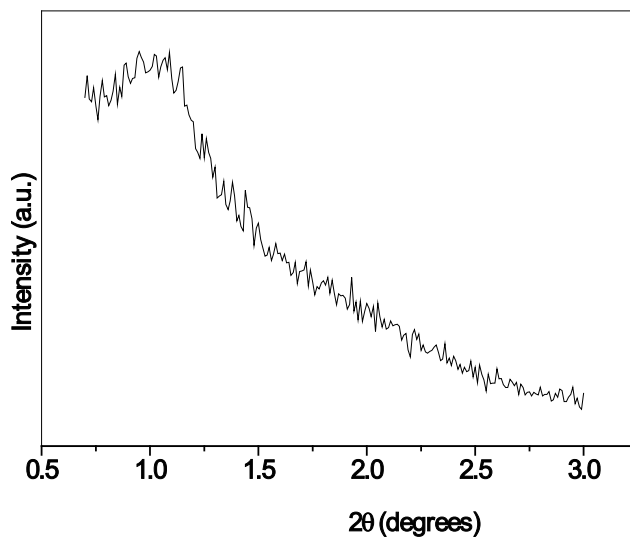

Fig.S8. XRD pattern of TS5-3h-5@95.
